# Supplementary material
Source: PubMed Central journal article supplement (PMC9872872)
Supplement: boe-13-11-5813-s001.pdf [file boe-13-11-5813-s001.pdf]

## **Deep attentive convolutional neural network for automatic grading of imbalanced diabetic retinopathy in retinal fundus images: supplement**

**FENG LI,<sup>1,\*</sup> SHIQING TANG,<sup>1</sup> YUYANG CHEN,<sup>1</sup> AND HAIDONG ZOU<sup>2,3</sup>**

<sup>1</sup>*School of Optical-Electrical and Computer Engineering, University of Shanghai for Science and Technology, Shanghai 200093, China*

<sup>2</sup>*Shanghai Eye Disease Prevention & Treatment Center, Shanghai 200040, China*

<sup>3</sup>*Ophthalmology Center, Shanghai General Hospital, Shanghai 200080, China*

\**lifenggold@163.com*

---

This supplement published with Optica Publishing Group on 14 October 2022 by The Authors under the terms of the [Creative Commons Attribution 4.0 License](https://creativecommons.org/licenses/by/4.0/) in the format provided by the authors and unedited. Further distribution of this work must maintain attribution to the author(s) and the published article's title, journal citation, and DOI.

Supplement DOI: <https://doi.org/10.6084/m9.figshare.21311274>

Parent Article DOI: <https://doi.org/10.1364/BOE.472176>

**Table S1. The DR grading result variability under different hyper-parameter k in DACNN using ResNet-50 as backbone on DDR dataset. The best results were shown in bold.**

|       | k=4   | k=5          | k=6   | k=7   | k=8   | k=9   |
|-------|-------|--------------|-------|-------|-------|-------|
| Acc   | 0.878 | <b>0.889</b> | 0.868 | 0.870 | 0.878 | 0.859 |
| Kappa | 0.924 | <b>0.930</b> | 0.903 | 0.921 | 0.925 | 0.913 |

Acc: accuracy

**Table S2. The DR grading performance of our DACNN with ResNet-50 backbone using different imbalanced ratios in DDR dataset. #M was the number of samples in the union of DR 0 and DR 2, and #L denoted the number of samples in the union of DR 1, DR 3, and DR 4. We used samples in the union of DR 1, DR 3, and DR 4 at 100%, 80%, and 60% ratios, respectively.**

| #M/#L | Ratio | Methods  | Acc   | Kappa |
|-------|-------|----------|-------|-------|
| 5/1   | 100%  | baseline | 0.858 | 0.905 |
|       |       | DACNN    | 0.889 | 0.930 |
| 6/1   | 80%   | baseline | 0.838 | 0.903 |
|       |       | DACNN    | 0.870 | 0.911 |
| 7/1   | 60%   | baseline | 0.823 | 0.893 |
|       |       | DACNN    | 0.864 | 0.901 |

Acc: accuracy

**Table S3. The DR grading results of recent cutting-edge category networks integrating the presented sASPP, GAM, CAM, and LCM on DDR dataset.**

| Method                            | Acc   | Kappa |
|-----------------------------------|-------|-------|
| (No.1) Baseline (MobileNet-1.0)   | 0.798 | 0.835 |
| (No.2) Baseline+GAM               | 0.809 | 0.847 |
| (No.3) Baseline+GAM+CAM           | 0.817 | 0.856 |
| (No.4) Baseline+GAM+CAM+LCM       | 0.849 | 0.901 |
| (No.5) Baseline+GAM+CAM+LCM+sASPP | 0.851 | 0.891 |
| (No.1) Baseline (Inception-v3)    | 0.863 | 0.918 |
| (No.2) Baseline+GAM               | 0.872 | 0.915 |
| (No.3) Baseline+GAM+CAM           | 0.874 | 0.925 |
| (No.4) Baseline+GAM+CAM+LCM       | 0.863 | 0.903 |
| (No.5) Baseline+GAM+CAM+LCM+sASPP | 0.876 | 0.918 |
| (No.1) Baseline (DenseNet-121)    | 0.732 | 0.755 |
| (No.2) Baseline+GAM               | 0.747 | 0.769 |
| (No.3) Baseline+GAM+CAM           | 0.751 | 0.778 |
| (No.4) Baseline+GAM+CAM+LCM       | 0.835 | 0.881 |
| (No.5) Baseline+GAM+CAM+LCM+sASPP | 0.845 | 0.906 |

Acc: accuracy
